# Supplementary material
Source: Springer Nature journal article supplement (https://www.springermedizin.de/resource/supplementary/13024_2014_552_MOESM2_ESM.pdf/9644382)
Supplement: MOESM2 [file 9644382]

# A – Tau protein

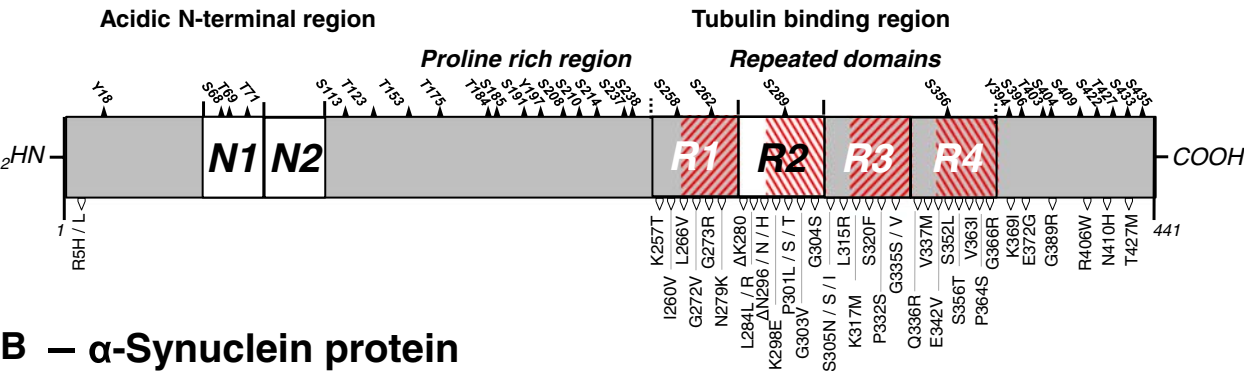

# B – α-Synuclein protein

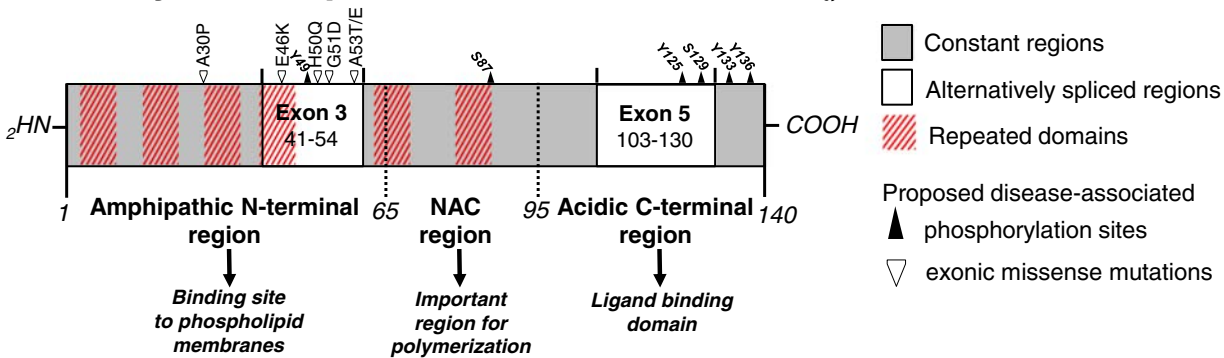

- Constant regions
- Alternatively spliced regions
- Repeated domains
- Proposed disease-associated
- ▲ phosphorylation sites
- ▽ exonic missense mutations
